# Supplementary material for: Monoclonal Antibody Therapy for COVID-19: A Retrospective Observational Study at a Regional Hospital
Source: Infect Dis Rep. 2023 Feb 20;15(1):125–31. doi: 10.3390/idr15010013 (PMC9956015; doi:10.3390/idr15010013)
Supplement: Supplementary file 1 [file idr-15-00013-s001.zip]

Archive with 5 entries (5 files):
- Fig S1 patient recruitment.pdf
- Table S1.pdf
- Table S2 CI only.pdf
- Table S3 hospitalized.pdf
- Table S4 CI only hospitalized.pdf
